# Supplementary material
Source: PubMed Central journal article supplement (PMC4522278)

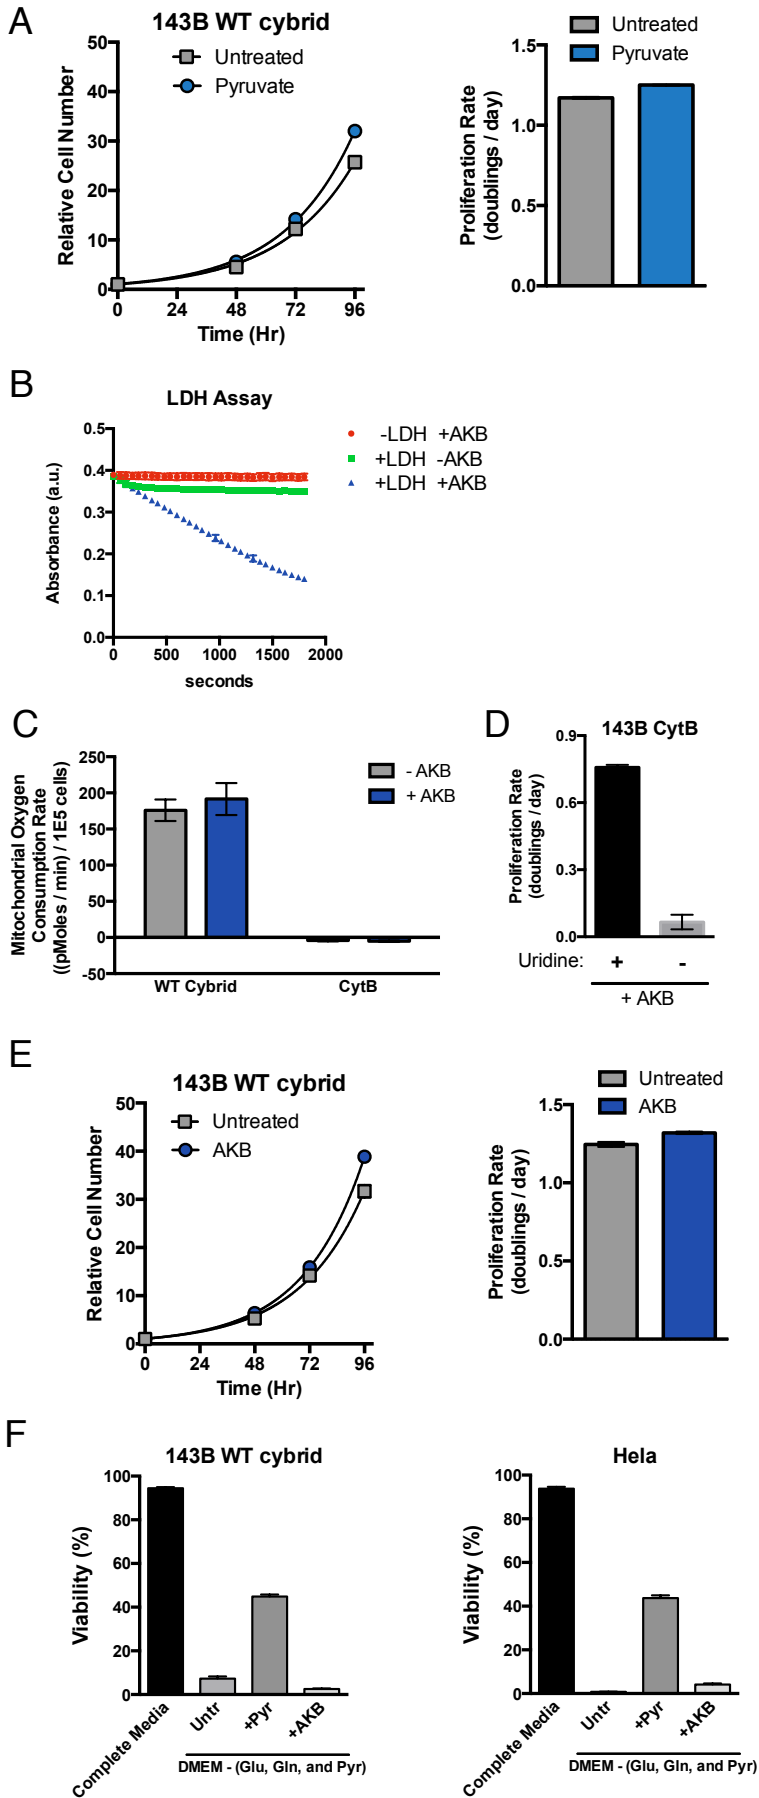

Supplement: NIHMS709568-supplement-2.pdf [file NIHMS709568-supplement-2.pdf]

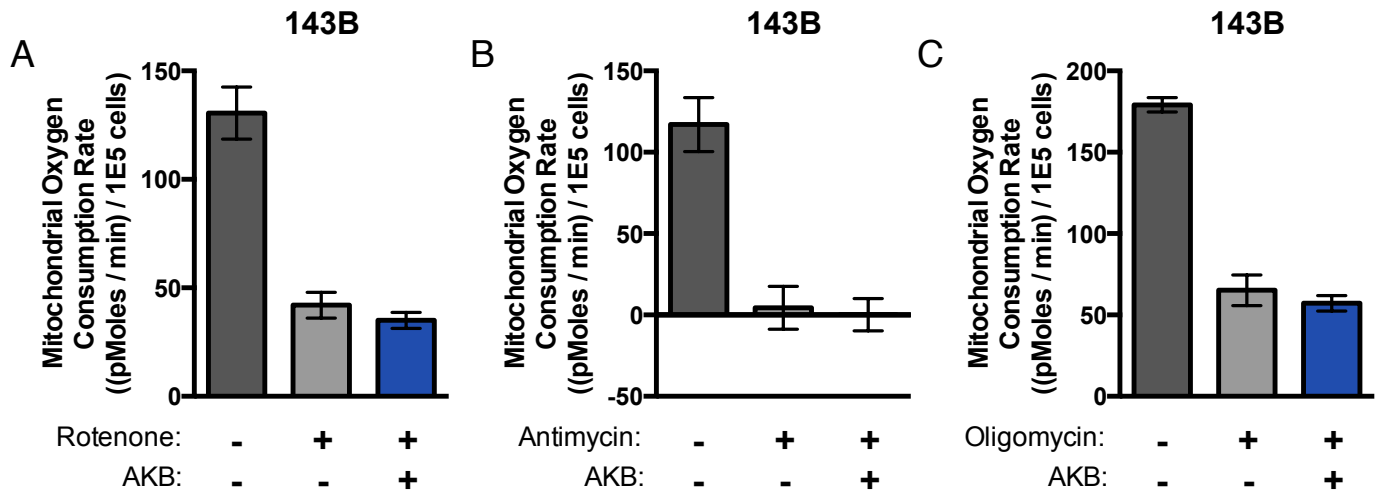

Supplement: NIHMS709568-supplement-3.pdf [file NIHMS709568-supplement-3.pdf]

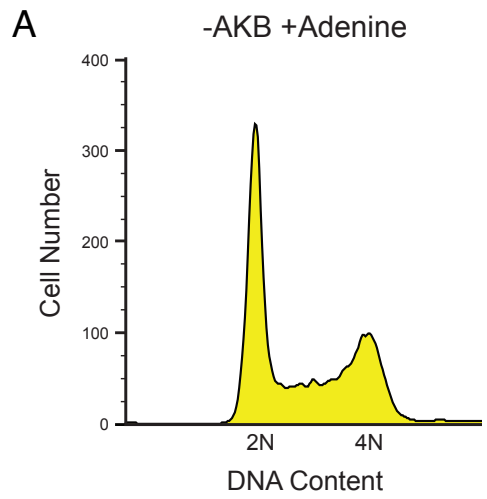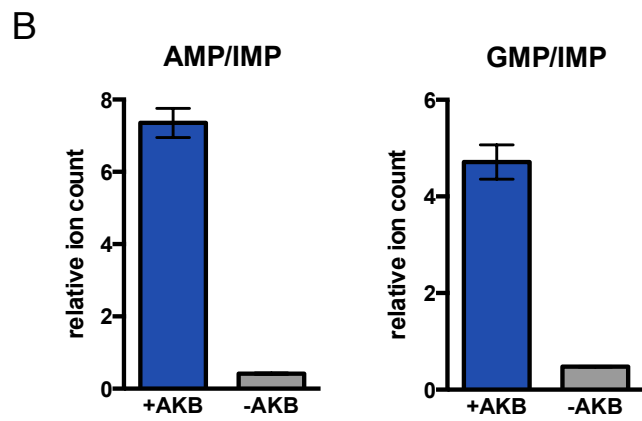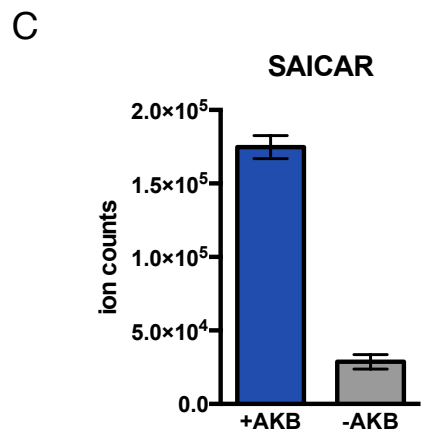

Supplement: NIHMS709568-supplement-4.pdf [file NIHMS709568-supplement-4.pdf]

A

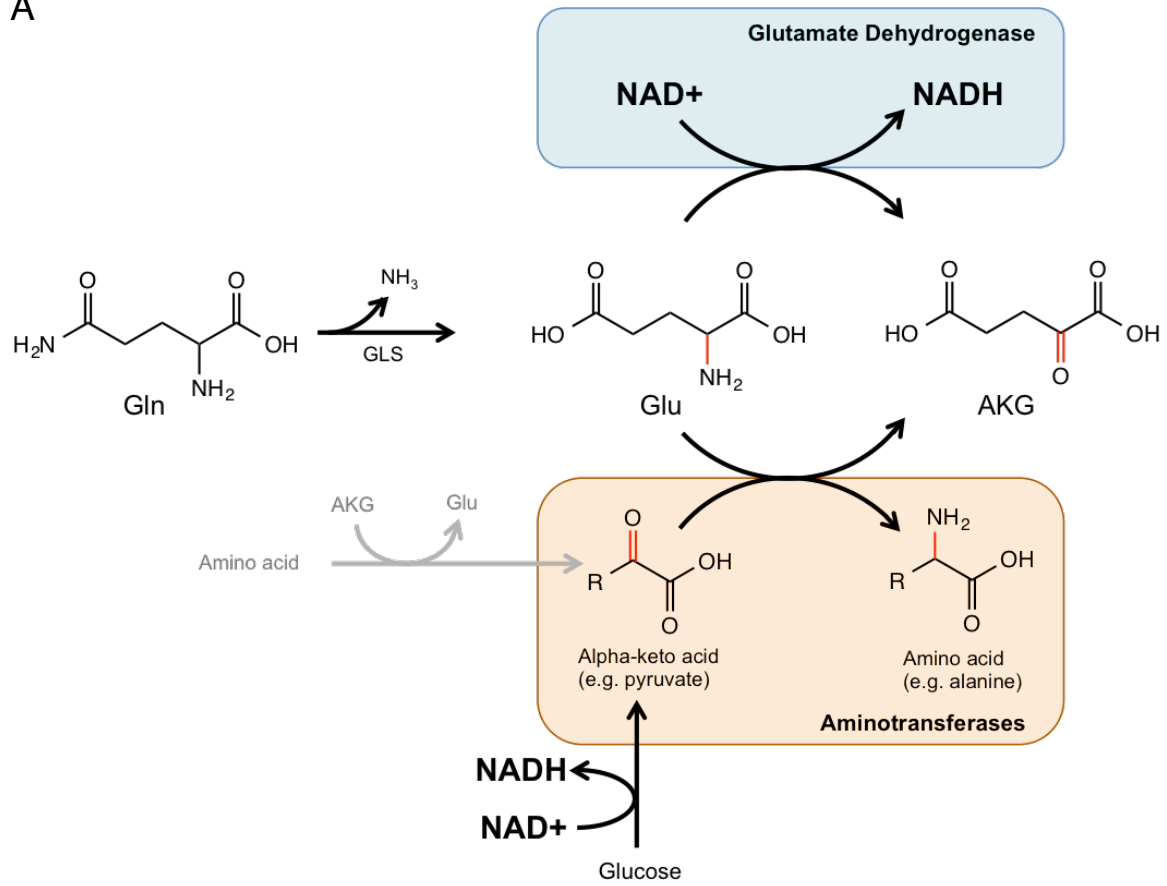

B

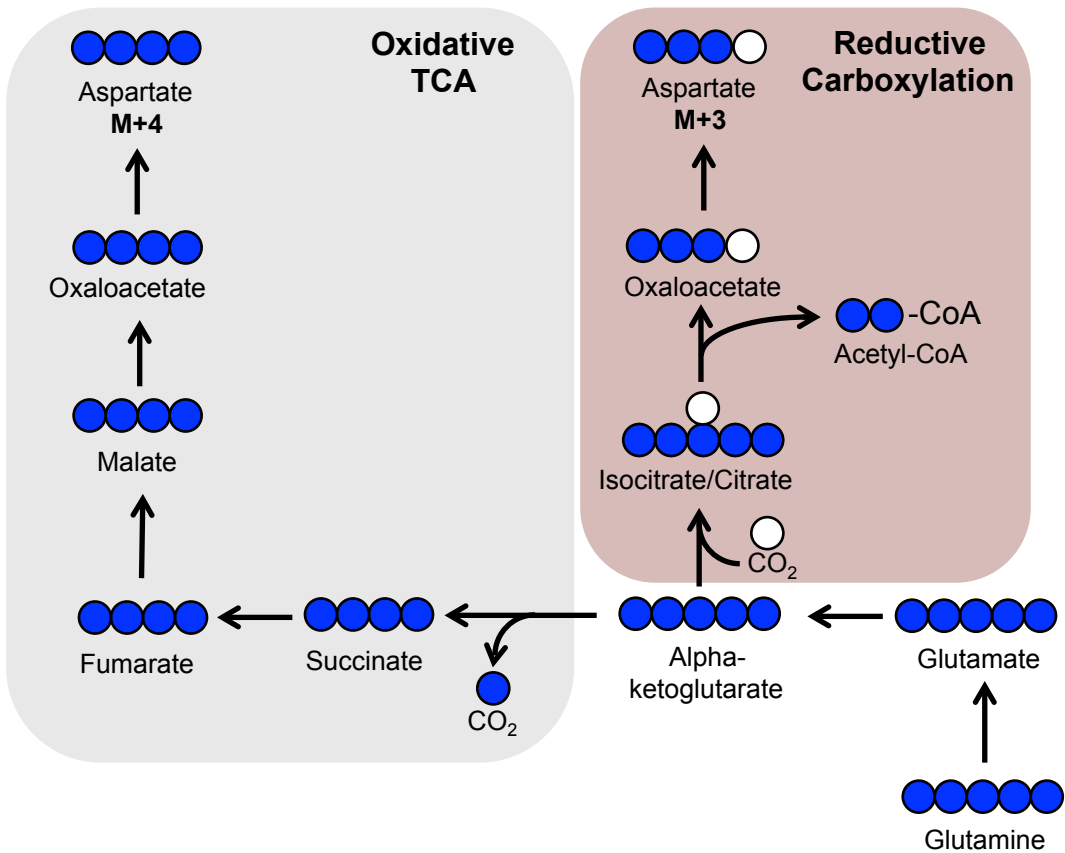

Supplement: NIHMS709568-supplement-5.pdf [file NIHMS709568-supplement-5.pdf]

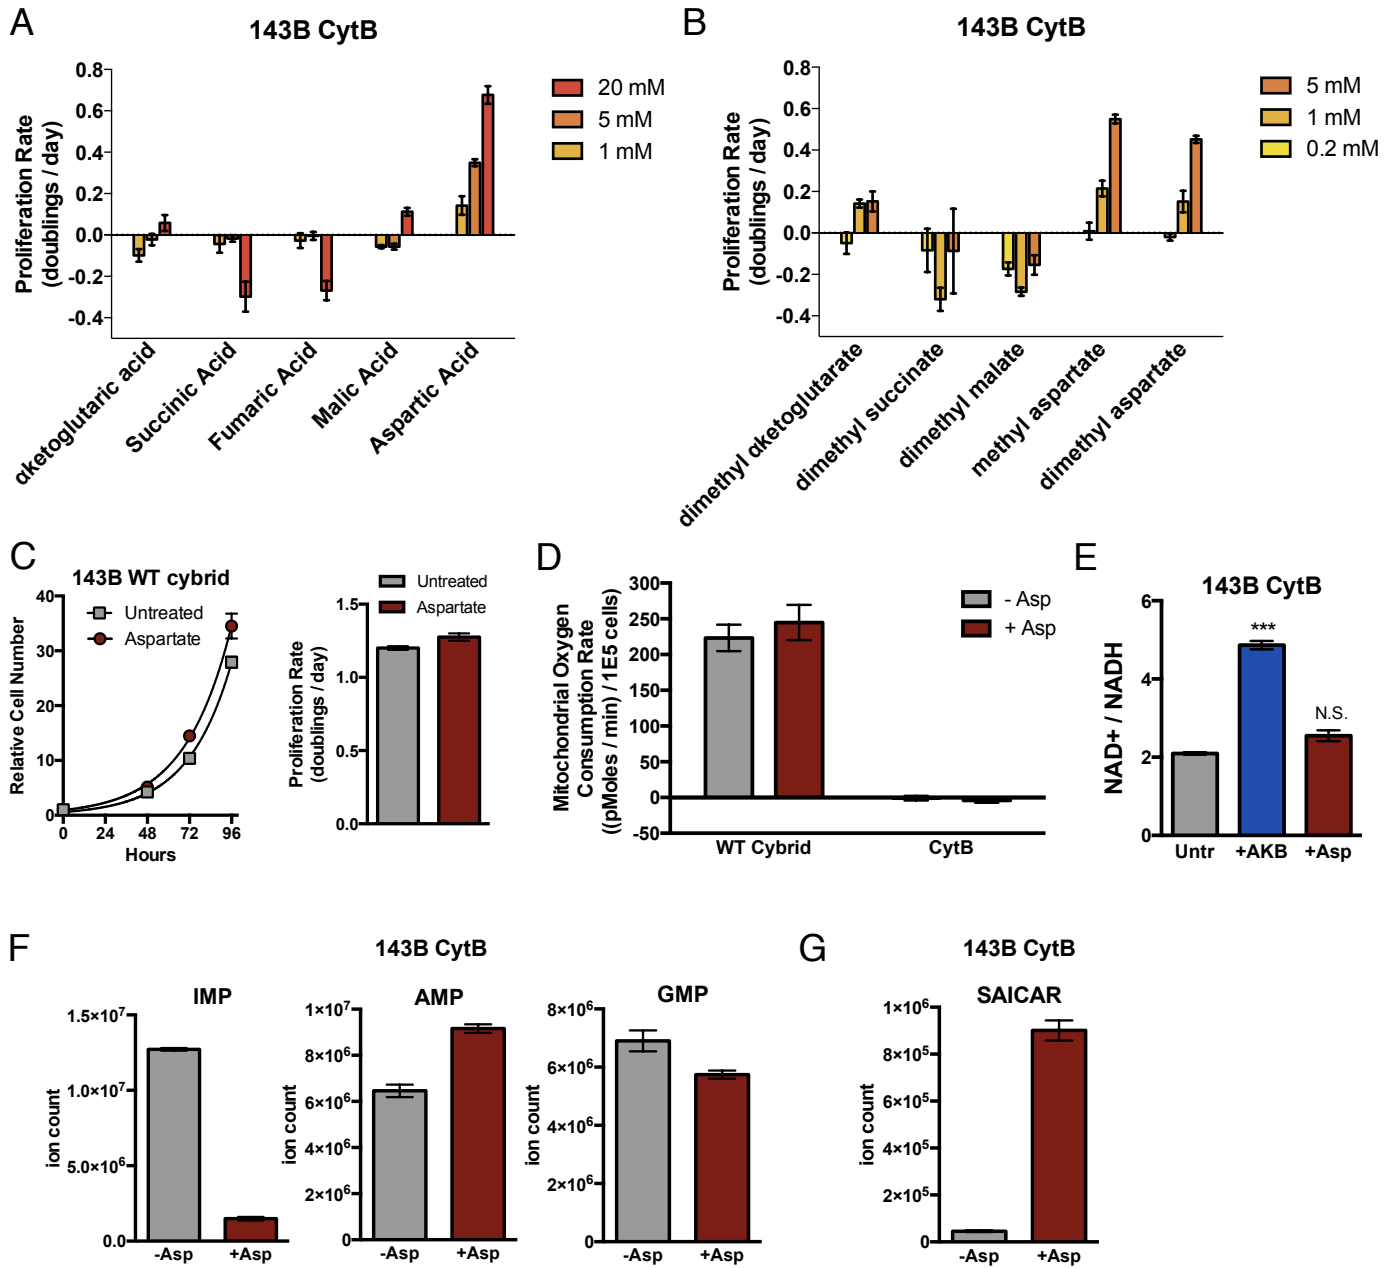

Supplement: NIHMS709568-supplement-6.pdf [file NIHMS709568-supplement-6.pdf]
